# Supplementary material
Source: MDPI journal article supplement (https://www.mdpi.com/2673-4184/1/2/9)
Supplement: s1 [file s1]

## Supplementary file

**Table S1.** Studies included in the review.

| Reference                      | Location                | Number of<br>Women   Number of<br>Men | Total<br>Sample | Proportion of<br>Women |
|--------------------------------|-------------------------|---------------------------------------|-----------------|------------------------|
| [1] Kane et al. 2020a          | North America           | 121   368                             | 489             | 24.7%                  |
| [2] Cheng et al. 2019          | Asia                    | 286   283                             | 569             | 50.3%                  |
| [3] Jena et al. 2019           | Asia                    | 43   58                               | 101             | 42.6%                  |
| [4] Pu et al. 2019             | Asia                    | 50   33                               | 83              | 60.2%                  |
| [5] Chen et al. 2018a          | Asia                    | 40   71                               | 111             | 36.0%                  |
| [6] Gomez-revuelta et al. 2018 | Europe                  | 94   108                              | 202             | 46.5%                  |
| [7] Schennach et al. 2018      | Europe                  | 49   63                               | 112             | 43.8%                  |
| [8] Huang et al. 2017          | Asia                    | 20   37                               | 57              | 35.1%                  |
| [9] Ismail et al. 2017         | More than one continent | 71   269                              | 340             | 20.9%                  |
| [10] Citrome et al. 2016       | Only USA                | 28   69                               | 97              | 28.9%                  |
| [11] Grunder et al. 2016       | Europe                  | 44   92                               | 136             | 32.4%                  |
| [12] Landbloom et al. 2016     | More than one continent | 148   209                             | 357             | 41.5%                  |
| [13] Lieberman et al. 2016a    | Only USA                | 58   276                              | 334             | 17.4%                  |
| [14] Litman et al. 2016        | Only USA                | 29   115                              | 144             | 20.1%                  |
| [15] Malla et al. 2016         | North America           | 16   69                               | 85              | 18.8%                  |
| [16] Nasser et al. 2016        | More than one continent | 79   258                              | 337             | 23.4%                  |
| [17] Parabiaghi et al. 2016    | Europe                  | 125   175                             | 300             | 41.7%                  |
| [18] Buckley et al. 2015       | Only USA                | 87   218                              | 305             | 28.5%                  |
| [19] Ishigooka et al. 2015a    | Asia                    | 168   277                             | 445             | 37.8%                  |
| [20] Meltzer et al. 2015a      | More than one continent | 200   423                             | 623             | 32.1%                  |
| [21] Moosavi et al. 2015       | Asia                    | 15   75                               | 90              | 16.7%                  |
| [22] Naber et al. 2015         | More than one continent | 113   168                             | 281             | 40.2%                  |
| [23] Robinson et al. 2015      | North America           | 58   140                              | 198             | 29.3%                  |
| [24] Subotnik et al. 2015      | Only USA                | 18   65                               | 83              | 21.7%                  |
| [25] Tybura et al. 2015        | Europe                  | 102   89                              | 191             | 53.4%                  |
| [26] Durgam et al. 2014        | More than one continent | 230   502                             | 732             | 31.4%                  |
| [27] Hatta et al. 2014a        | Asia                    | 86   70                               | 156             | 55.1%                  |
| [28] Li et al. 2014a           | Asia                    | 134   145                             | 279             | 48.0%                  |
| [29] Mirabzadeh et al. 2014    | Asia                    | 0   66                                | 66              | 0.0%                   |
| [30] Shen et al. 2014          | More than one continent | 80   209                              | 289             | 27.7%                  |
| [31] Shoja et al. 2014         | Asia                    | 60   0                                | 60              | 100.0%                 |
| [32] Amr et al. 2013           | Asia                    | 27   46                               | 73              | 37.0%                  |
| [33] Wang et al. 2013          | Asia                    | 26   331                              | 357             | 7.3%                   |
| [34] Chung et al. 2012         | Asia                    | 30   61                               | 91              | 33.0%                  |
| [35] Jindal et al. 2012        | Asia                    | 26   34                               | 60              | 43.3%                  |
| [36] Kane et al. 2012b         | More than one continent | 162   241                             | 403             | 40.2%                  |
| [37] Kwon et al. 2012          | Asia                    | 177   212                             | 389             | 45.5%                  |
| [38] Li et al. 2012b           | Asia                    | 66   53                               | 119             | 55.5%                  |
| [39] Pawar et al. 2012         | Asia                    | 29   35                               | 64              | 45.3%                  |
| [40] Witte et al. 2012         | More than one continent | 119   285                             | 404             | 29.5%                  |
| [41] Grootens et al. 2011      | Europe                  | 13   61                               | 74              | 17.6%                  |
| [42] Harvey et al. 2011a       | Only USA                | 89   212                              | 301             | 29.6%                  |
| [43] Li et al. 2011c           | Asia                    | 271   181                             | 452             | 60.0%                  |
| [44] Meltzer et al. 2011b      | More than one continent | 104   369                             | 473             | 22.0%                  |
| [45] Shah et al. 2011          | Asia                    | 76   138                              | 214             | 35.5%                  |
| [46] Xiang et al. 2011         | Asia                    | 202   172                             | 374             | 54.0%                  |

|      |                           |                         |          |      |       |
|------|---------------------------|-------------------------|----------|------|-------|
| [47] | Zhang et al. 2011         | Asia                    | 120 119  | 239  | 50.2% |
| [48] | Bhowmick et al. 2010      | Asia                    | 38 42    | 80   | 47.5% |
| [49] | Chen et al. 2010b         | Asia                    | 98 80    | 178  | 55.1% |
| [50] | Gaebel et al. 2010a       | More than one continent | 280 386  | 666  | 42.0% |
| [51] | Johnsen et al. 2010       | Europe                  | 69 144   | 213  | 32.4% |
| [52] | MacFadden et al. 2010     | More than one continent | 139 210  | 349  | 39.8% |
| [53] | Pandina et al. 2010       | More than one continent | 513 701  | 1214 | 42.3% |
| [54] | Roberts et al. 2010       | Only USA                | 69 154   | 223  | 30.9% |
| [55] | Fleischhacker et al. 2009 | More than one continent | 304 399  | 703  | 43.2% |
| [56] | Hatta et al. 2009b        | Asia                    | 47 33    | 80   | 58.8% |
| [57] | Lublin et al. 2009        | More than one continent | 140 153  | 293  | 47.8% |
| [58] | Oliveira et al. 2009      | Latin America           | 45 54    | 99   | 45.5% |
| [59] | Cutler et al. 2008a       | More than one continent | 121 472  | 593  | 20.4% |
| [60] | Jerrell et al. 2008       | Only USA                | 39 68    | 107  | 36.4% |
| [61] | Kahn et al. 2008          | More than one continent | 200 298  | 498  | 40.2% |
| [62] | Kolotkin et al. 2008      | Europe                  | 219 322  | 541  | 40.5% |
| [63] | Nimwegen et al. 2008      | Europe                  | 26 102   | 128  | 20.3% |
| [64] | Sacchetti et al. 2008     | Europe                  | 33 42    | 75   | 44.0% |
| [65] | Safa et al. 2008          | Asia                    | 31 32    | 63   | 49.2% |
| [66] | Dossenbach et al. 2007a   | More than one continent | 32 91    | 123  | 26.0% |
| [67] | Goldberg et al. 2007      | Not reported            | 79 109   | 188  | 42.0% |
| [68] | Kane et al. 2007c         | More than one continent | 301 327  | 628  | 47.9% |
| [69] | Marder et al. 2007a       | Only USA                | 115 329  | 444  | 25.9% |
| [70] | McEvoy et al. 2007        | Not reported            | 94 326   | 420  | 22.4% |
| [71] | Zimbroff et al. 2007      | Only USA                | 84 169   | 253  | 33.2% |
| [72] | Azarin et al. 2006        | Europe                  | 73 113   | 186  | 39.2% |
| [73] | Cutler et al. 2006b       | North America           | 79 288   | 367  | 21.5% |
| [74] | Harvey et al. 2006b       | Not reported            | 67 222   | 289  | 23.2% |
| [75] | Harvey et al. 2006c       | Not reported            | 25 47    | 72   | 34.7% |
| [76] | Kinon et al. 2006a        | Not reported            | 118 228  | 346  | 34.1% |
| [77] | Lecrubier et al. 2006     | Not reported            | 78 166   | 244  | 32.0% |
| [78] | McCue et al. 2006         | Not reported            | 121 198  | 319  | 37.9% |
| [79] | Brook et al. 2005a        | Not reported            | 190 377  | 567  | 33.5% |
| [80] | Chue et al. 2005          | More than one continent | 226 414  | 640  | 35.3% |
| [81] | Lieberman et al. 2005b    | Only USA                | 380 1080 | 1460 | 26.0% |
| [82] | Schooler et al. 2005      | More than one continent | 159 396  | 555  | 28.6% |
| [83] | Strakowski et al. 2005    | More than one continent | 39 156   | 195  | 20.0% |
| [84] | Addington et al. 2004     | More than one continent | 81 215   | 296  | 27.4% |
| [85] | Appelper et al. 2004      | Europe                  | 20 30    | 50   | 40.0% |
| [86] | Corrigan et al. 2004      | More than one continent | 160 307  | 467  | 34.3% |
| [87] | Currier et al. 2004       | Only USA                | 57 105   | 162  | 35.2% |
| [88] | Daniel et al. 2004a       | Only USA                | 35 271   | 306  | 11.4% |
| [89] | Dossenbach et al. 2004b   | Europe                  | 32 28    | 60   | 53.3% |
| [90] | Gaebel et al. 2004b       | Europe                  | 60 80    | 140  | 42.9% |
| [91] | Harrigan et al. 2004      | Not reported            | 44 139   | 183  | 24.0% |
| [92] | Kinon et al. 2004b        | Not reported            | 30 70    | 100  | 30.0% |
| [93] | Knegtering et al. 2004    | Not reported            | 15 36    | 51   | 29.4% |
| [94] | Mari et al. 2004          | Latin America           | 43 154   | 197  | 21.8% |
| [95] | McQuade et al. 2004       | More than one continent | 88 229   | 317  | 27.8% |
| [96] | Mortimer et al. 2004      | More than one continent | 132 245  | 377  | 35.0% |
| [97] | Simpson et al. 2004       | Not reported            | 93 176   | 269  | 34.6% |
| [98] | Yamashita et al. 2004     | Asia                    | 44 48    | 92   | 47.8% |
| [99] | Beasley et al. 2003a      | More than one continent | 153 173  | 326  | 46.9% |

|                              |                         |          |      |       |
|------------------------------|-------------------------|----------|------|-------|
| [100] Gureje et al. 2003     | Oceania                 | 27 38    | 65   | 41.5% |
| [101] Harvey et al. 2003d    | Not reported            | 122 54   | 176  | 69.3% |
| [102] Hertling et al. 2003   | Europe                  | 54 90    | 144  | 37.5% |
| [103] Kane et al. 2003d      | Only USA                | 100 300  | 400  | 25.0% |
| [104] Kasper et al. 2003     | More than one continent | 536 758  | 1294 | 41.4% |
| [105] Lieberman et al. 2003c | North America           | 48 215   | 263  | 18.3% |
| [106] Pigott et al. 2003     | More than one continent | 136 174  | 310  | 43.9% |
| [107] Potkin et al. 2003     | Only USA                | 121 283  | 404  | 30.0% |
| [108] Ritchie et al. 2003    | Oceania                 | 47 19    | 66   | 71.2% |
| [109] Wright et al. 2003     | More than one continent | 107 204  | 311  | 34.4% |
| [110] Arato et al. 2002      | Europe                  | 80 214   | 294  | 27.2% |
| [111] Breier et al. 2002     | More than one continent | 115 155  | 270  | 42.6% |
| [112] Csernansky et al. 2002 | Only USA                | 110 255  | 365  | 30.1% |
| [113] Hirsch et al. 2002     | Not reported            | 104 197  | 301  | 34.6% |
| [114] Kane et al. 2002e      | Only USA                | 126 288  | 414  | 30.4% |
| [115] Lee et al. 2002        | Not reported            | 54 54    | 108  | 50.0% |
| [116] Sechter et al. 2002    | Europe                  | 140 170  | 310  | 45.2% |
| [117] Conley et al. 2001     | Only USA                | 103 274  | 377  | 27.3% |
| [118] Daniel et al. 2001b    | Only USA                | 15 64    | 79   | 19.0% |
| [119] Ishigooka et al. 2001b | Asia                    | 61 113   | 174  | 35.1% |
| [120] Lessem et al. 2001     | Only USA                | 39 78    | 117  | 33.3% |
| [121] Bouchard et al. 2000   | North America           | 56 119   | 175  | 32.0% |
| [122] Brook et al. 2000b     | More than one continent | 9 123    | 132  | 6.8%  |
| [123] Copolov et al. 2000    | More than one continent | 143 305  | 448  | 31.9% |
| [124] Emsley et al. 2000a    | More than one continent | 85 203   | 288  | 29.5% |
| [125] Heck et al. 2000       | Europe                  | 39 38    | 77   | 50.6% |
| [126] Purdon et al. 2000     | Not reported            | 20 45    | 65   | 30.8% |
| [127] Daniel et al. 1999c    | North America           | 87 215   | 302  | 28.8% |
| [128] Emsley et al. 1999b    | More than one continent | 61 122   | 183  | 33.3% |
| [129] Peuskens et al. 1999a  | Europe                  | 91 137   | 228  | 39.9% |
| [130] Goff et al. 1998       | Only USA                | 6 84     | 90   | 6.7%  |
| [131] Keck et al. 1998       | Only USA                | 29 110   | 139  | 20.9% |
| [132] King et al. 1998       | More than one continent | 209 409  | 618  | 33.8% |
| [133] Arvanitis et al. 1997  | North America           | 87 274   | 361  | 24.1% |
| [134] Beasley et al. 1997b   | More than one continent | 146 275  | 421  | 34.7% |
| [135] Peuskens et al. 1997b  | More than one continent | 72 129   | 201  | 35.8% |
| [136] Small et al. 1997      | More than one continent | 83 203   | 286  | 29.0% |
| [137] Tollefson et al. 1997  | More than one continent | 700 1295 | 1995 | 35.1% |
| [138] Tran et al. 1997       | More than one continent | 119 220  | 339  | 35.1% |
| [139] Beasley et al. 1996c   | Only USA                | 42 110   | 152  | 27.6% |
| [140] Beasley et al. 1996d   | Only USA                | 41 294   | 335  | 12.2% |
| [141] Blin et al. 1996       | Europe                  | 24 38    | 62   | 38.7% |
| [142] Borison et al. 1996    | Not reported            | 11 98    | 109  | 10.1% |
| [143] Huttunen et al. 1995   | Europe                  | 51 47    | 98   | 52.0% |
| [144] Peuskens et al. 1995c  | More than one continent | 468 894  | 1362 | 34.4% |
| [145] Marder et al. 1994b    | Only USA                | 48 340   | 388  | 12.4% |
| [146] Ceskova et al. 1993    | Europe                  | 17 45    | 62   | 27.4% |
| [147] Choinard et al. 1993   | North America           | 39 96    | 135  | 28.9% |
| [148] Hoyberg et al. 1993    | Europe                  | 30 107   | 137  | 21.9% |

#### References from included studies:

1. Kane, J.M.; Schooler, N.R.; Marcy, P.; Correll, C.U.; Achtyes, E.D.; Gibbons, R.D.; Robinson, D.G. Effect of Long-Acting Injectable Antipsychotics vs Usual Care on Time to First

Hospitalization in Early-Phase Schizophrenia: A Randomized Clinical Trial. *JAMA Psychiatry* **2020**, *77*, 1217–1224, doi:10.1001/jamapsychiatry.2020.2076.

2. Citrome, L.; Ota, A.; Nagamizu, K.; Perry, P.; Weiller, E.; Baker, R.A. The Effect of Brexpiprazole (OPC-34712) and Aripiprazole in Adult Patients with Acute Schizophrenia: Results from a Randomized, Exploratory Study. *Int. Clin. Psychopharmacol.* **2016**, *31*, 192–201, doi:10.1097/YIC.000000000000123.
3. Gureje, O.; Miles, W.; Keks, N.; Grainger, D.; Lambert, T.; McGrath, J.; Tran, P.; Catts, S.; Fraser, A.; Hustig, H.; et al. Olanzapine vs Risperidone in the Management of Schizophrenia: A Randomized Double-Blind Trial in Australia and New Zealand. *Schizophr. Res.* **2003**, *61*, 303–314, doi:10.1016/s0920-9964(02)00226-8.
4. Harvey, P.D.; Napolitano, J.A.; Mao, L.; Gharabawi, G. Comparative Effects of Risperidone and Olanzapine on Cognition in Elderly Patients with Schizophrenia or Schizoaffective Disorder. *Int. J. Geriatr. Psychiatry* **2003**, *18*, 820–829, doi:10.1002/gps.929.
5. Hertling, I.; Philipp, M.; Dvorak, A.; Glaser, T.; Mast, O.; Beneke, M.; Ramskogler, K.; Salatu-Zyhlarz, G.; Walter, H.; Lesch, O.M. Flupenthixol versus Risperidone: Subjective Quality of Life as an Important Factor for Compliance in Chronic Schizophrenic Patients. *Neuropsychobiology* **2003**, *47*, 37–46, doi:10.1159/000068874.
6. Kane, J.M.; Eerdekens, M.; Lindenmayer, J.-P.; Keith, S.J.; Lesem, M.; Karcher, K. Long-Acting Injectable Risperidone: Efficacy and Safety of the First Long-Acting Atypical Antipsychotic. *Am. J. Psychiatry* **2003**, *160*, 1125–1132, doi:10.1176/appi.ajp.160.6.1125.
7. Kasper, S.; Lerman, M.N.; McQuade, R.D.; Saha, A.; Carson, W.H.; Ali, M.; Archibald, D.; Ingenito, G.; Marcus, R.; Pigott, T. Efficacy and Safety of Aripiprazole vs. Haloperidol for Long-Term Maintenance Treatment Following Acute Relapse of Schizophrenia. *Int. J. Neuropsychopharmacol.* **2003**, *6*, 325–337, doi:10.1017/S1461145703003651.
8. Lieberman, J.A.; Tollefson, G.; Tohen, M.; Green, A.I.; Gur, R.E.; Kahn, R.; McEvoy, J.; Perkins, D.; Sharma, T.; Zipursky, R.; et al. Comparative Efficacy and Safety of Atypical and Conventional Antipsychotic Drugs in First-Episode Psychosis: A Randomized, Double-Blind Trial of Olanzapine versus Haloperidol. *Am. J. Psychiatry* **2003**, *160*, 1396–1404, doi:10.1176/appi.ajp.160.8.1396.
9. Pigott, T.A.; Carson, W.H.; Saha, A.R.; Torbeyns, A.F.; Stock, E.G.; Ingenito, G.G. Aripiprazole for the Prevention of Relapse in Stabilized Patients with Chronic Schizophrenia: A Placebo-Controlled 26-Week Study. *J. Clin. Psychiatry* **2003**, *64*, 1048–1056, doi:10.4088/jcp.v64n0910.
10. Potkin, S.G.; Saha, A.R.; Kujawa, M.J.; Carson, W.H.; Ali, M.; Stock, E.; Stringfellow, J.; Ingenito, G.; Marder, S.R. Aripiprazole, an Antipsychotic with a Novel Mechanism of Action, and Risperidone vs Placebo in Patients with Schizophrenia and Schizoaffective Disorder. *Arch. Gen. Psychiatry* **2003**, *60*, 681–690, doi:10.1001/archpsyc.60.7.681.
11. Ritchie, C.W.; Chiu, E.; Harrigan, S.; Hall, K.; Hassett, A.; Macfarlane, S.; Mastwyk, M.; O'Connor, D.W.; Opie, J.; Ames, D. The Impact upon Extra-Pyramidal Side Effects, Clinical Symptoms and Quality of Life of a Switch from Conventional to Atypical Antipsychotics (Risperidone or Olanzapine) in Elderly Patients with Schizophrenia. *Int. J. Geriatr. Psychiatry* **2003**, *18*, 432–440, doi:10.1002/gps.862.
12. Wright, P.; Meehan, K.; Birkett, M.; Lindborg, S.R.; Taylor, C.C.; Morris, P.; Breier, A. A Comparison of the Efficacy and Safety of Olanzapine versus Haloperidol during Transition from Intramuscular to Oral Therapy. *Clin. Ther.* **2003**, *25*, 1420–1428, doi:10.1016/s0149-2918(03)80129-7.
13. Gründer, G.; Heinze, M.; Cordes, J.; Mühlbauer, B.; Juckel, G.; Schulz, C.; Rüther, E.; Timm, J. Effects of First-Generation Antipsychotics versus Second-Generation Antipsychotics on Quality of Life in Schizophrenia: A Double-Blind, Randomised Study. *Lancet Psychiatry* **2016**, *3*, 717–729, doi:10.1016/S2215-0366(16)00085-7.
14. Arato, M.; O'Connor, R.; Meltzer, H.Y. A 1-Year, Double-Blind, Placebo-Controlled Trial of Ziprasidone 40, 80 and 160 Mg/Day in Chronic Schizophrenia: The Ziprasidone Extended Use in Schizophrenia (ZEUS) Study. *Int. Clin. Psychopharmacol.* **2002**, *17*, 207–215, doi:10.1097/00004850-200209000-00001.

15. Breier, A.; Meehan, K.; Birkett, M.; David, S.; Ferchland, I.; Sutton, V.; Taylor, C.C.; Palmer, R.; Dossenbach, M.; Kiesler, G.; et al. A Double-Blind, Placebo-Controlled Dose-Response Comparison of Intramuscular Olanzapine and Haloperidol in the Treatment of Acute Agitation in Schizophrenia. *Arch. Gen. Psychiatry* **2002**, *59*, 441–448, doi:10.1001/archpsyc.59.5.441.
16. Csernansky, J.G.; Mahmoud, R.; Brenner, R. A Comparison of Risperidone and Haloperidol for the Prevention of Relapse in Patients with Schizophrenia. *N. Engl. J. Med.* **2002**, *346*, 16–22, doi:10.1056/nejmoa002028.
17. Hirsch, S.R.; Kissling, W.; Bäuml, J.; Power, A.; O'Connor, R. A 28-Week Comparison of Ziprasidone and Haloperidol in Outpatients with Stable Schizophrenia. *J. Clin. Psychiatry* **2002**, *63*, 516–523, doi:10.4088/jcp.v63n0609.
18. Kane, J.M.; Carson, W.H.; Saha, A.R.; McQuade, R.D.; Ingenito, G.G.; Zimbroff, D.L.; Ali, M.W. Efficacy and Safety of Aripiprazole and Haloperidol versus Placebo in Patients with Schizophrenia and Schizoaffective Disorder. *J. Clin. Psychiatry* **2002**, *63*, 763–771, doi:10.4088/jcp.v63n0903.
19. Lee, C.-T.; Conde, B.J.L.; Mazlan, M.; Visanuyothin, T.; Wang, A.; Wong, M.M.C.; Walker, D.J.; Roychowdhury, S.M.; Wang, H.; Tran, P. V Switching to Olanzapine from Previous Antipsychotics: A Regional Collaborative Multicenter Trial Assessing 2 Switching Techniques in Asia Pacific. *J. Clin. Psychiatry* **2002**, *63*, 569–576, doi:10.4088/jcp.v63n0706.
20. Sechter, D.; Peuskens, J.; Fleurot, O.; Rein, W.; Lecrubier, Y. Amisulpride vs. Risperidone in Chronic Schizophrenia: Results of a 6-Month Double-Blind Study. *Neuropsychopharmacol. Off. Publ. Am. Coll. Neuropsychopharmacol.* **2002**, *27*, 1071–1081, doi:10.1016/S0893-133X(02)00375-5.
21. Conley, R.R.; Mahmoud, R. A Randomized Double-Blind Study of Risperidone and Olanzapine in the Treatment of Schizophrenia or Schizoaffective Disorder. *Am. J. Psychiatry* **2001**, *158*, 765–774, doi:10.1176/appi.ajp.158.5.765.
22. Daniel, D.G.; Potkin, S.G.; Reeves, K.R.; Swift, R.H.; Harrigan, E.P. Intramuscular (IM) Ziprasidone 20 Mg Is Effective in Reducing Acute Agitation Associated with Psychosis: A Double-Blind, Randomized Trial. *Psychopharmacology (Berl)* **2001**, *155*, 128–134, doi:10.1007/s002130000658.
23. Ishigooka, J.; Inada, T.; Miura, S. Olanzapine versus Haloperidol in the Treatment of Patients with Chronic Schizophrenia: Results of the Japan Multicenter, Double-Blind Olanzapine Trial. *Psychiatry Clin. Neurosci.* **2001**, *55*, 403–414, doi:10.1046/j.1440-1819.2001.00882.x.
24. Landbloom, R.; MacKle, M.; Wu, X.; Kelly, L.; Snow-Adami, L.; McIntyre, R.S.; Mathews, M.; Hundt, C. Asenapine for the Treatment of Adults with an Acute Exacerbation of Schizophrenia: Results from a Randomized, Double-Blind, Fixed-Dose, Placebo-Controlled Trial with Olanzapine as an Active Control. *CNS Spectr.* **2017**, *22*, 333–341, doi:10.1017/S1092852916000377.
25. Lesem, M.D.; Zajecka, J.M.; Swift, R.H.; Reeves, K.R.; Harrigan, E.P. Intramuscular Ziprasidone, 2 Mg versus 10 Mg, in the Short-Term Management of Agitated Psychotic Patients. *J. Clin. Psychiatry* **2001**, *62*, 12–18, doi:10.4088/jcp.v62n0104.
26. Bouchard, R.H.; Mérette, C.; Pourcher, E.; Demers, M.F.; Villeneuve, J.; Roy-Gagnon, M.H.; Gauthier, Y.; Cliche, D.; Labelle, A.; Filteau, M.J.; et al. Longitudinal Comparative Study of Risperidone and Conventional Neuroleptics for Treating Patients with Schizophrenia. The Quebec Schizophrenia Study Group. *J. Clin. Psychopharmacol.* **2000**, *20*, 295–304, doi:10.1097/00004714-200006000-00002.
27. Brook, S. A Pilot Study of Intramuscular Ziprasidone in the Short-Term Treatment of Patients with Acute Exacerbation of Schizophrenia. *Hum. Psychopharmacol.* **2000**, *15*, 521–524, doi:10.1002/1099-1077(200010)15:7<521::AID-HUP235>3.0.CO;2-V.
28. Copolov, D.L.; Link, C.G.; Kowalczyk, B. A Multicentre, Double-Blind, Randomized Comparison of Quetiapine (ICI 204,636, 'Seroquel') and Haloperidol in Schizophrenia. *Psychol. Med.* **2000**, *30*, 95–105, doi:10.1017/s0033291799001476.
29. Emsley, R.A.; Raniwalla, J.; Bailey, P.J.; Jones, A.M. A Comparison of the Effects of Quetiapine ('Seroquel') and Haloperidol in Schizophrenic Patients with a History of and a

Demonstrated, Partial Response to Conventional Antipsychotic Treatment. *Int. Clin. Psychopharmacol.* **2000**, *15*, 121–131, doi:10.1097/00004850-200015030-00001.

30. Heck, A.H.; Haffmans, P.M.J.; De Groot, I.W.; Hoencamp, E. Risperidone versus Haloperidol in Psychotic Patients with Disturbing Neuroleptic-Induced Extrapyrarnidal Symptoms: A Double-Blind, Multi-Center Trial. *Schizophr. Res.* **2000**, *46*, 97–105, doi:10.1016/S0920-9964(00)00009-8.
31. Purdon, S.E.; Jones, B.D.; Stip, E.; Labelle, A.; Addington, D.; David, S.R.; Breier, A.; Tollefson, G.D. Neuropsychological Change in Early Phase Schizophrenia during 12 Months of Treatment with Olanzapine, Risperidone, or Haloperidol. The Canadian Collaborative Group for Research in Schizophrenia. *Arch. Gen. Psychiatry* **2000**, *57*, 249–258, doi:10.1001/archpsyc.57.3.249.
32. Daniel, D.G.; Zimbroff, D.L.; Potkin, S.G.; Reeves, K.R.; Harrigan, E.P.; Lakshminarayanan, M. Ziprasidone 80 Mg/Day and 160 Mg/Day in the Acute Exacerbation of Schizophrenia and Schizoaffective Disorder: A 6-Week Placebo-Controlled Trial. Ziprasidone Study Group. *Neuropsychopharmacol. Off. Publ. Am. Coll. Neuropsychopharmacol.* **1999**, *20*, 491–505, doi:10.1016/S0893-133X(98)00090-6.
33. Emsley, R.A. Risperidone in the Treatment of First-Episode Psychotic Patients: A Double-Blind Multicenter Study. Risperidone Working Group. *Schizophr. Bull.* **1999**, *25*, 721–729, doi:10.1093/oxfordjournals.schbul.a033413.
34. Peuskens, J.; Bech, P.; Möller, H.J.; Bale, R.; Fleurot, O.; Rein, W. Amisulpride vs. Risperidone in the Treatment of Acute Exacerbations of Schizophrenia. *Psychiatry Res.* **1999**, *88*, 107–117, doi:10.1016/S0165-1781(99)00075-X.
35. Lieberman, J.A.; Davis, R.E.; Correll, C.U.; Goff, D.C.; Kane, J.M.; Tamminga, C.A.; Mates, S.; Vanover, K.E. ITI-007 for the Treatment of Schizophrenia: A 4-Week Randomized, Double-Blind, Controlled Trial. *Biol. Psychiatry* **2016**, *79*, 952–961, doi:10.1016/j.biopsych.2015.08.026.
36. Goff, D.C.; Posever, T.; Herz, L.; Simmons, J.; Kletti, N.; Lapierre, K.; Wilner, K.D.; Law, C.G.; Ko, G.N. An Exploratory Haloperidol-Controlled Dose-Finding Study of Ziprasidone in Hospitalized Patients with Schizophrenia or Schizoaffective Disorder. *J. Clin. Psychopharmacol.* **1998**, *18*, 296–304, doi:10.1097/00004714-199808000-00009.
37. Keck, P.J.; Buffenstein, A.; Ferguson, J.; Feighner, J.; Jaffe, W.; Harrigan, E.P.; Morrissey, M.R. Ziprasidone 40 and 120 Mg/Day in the Acute Exacerbation of Schizophrenia and Schizoaffective Disorder: A 4-Week Placebo-Controlled Trial. *Psychopharmacology (Berl)*. **1998**, *140*, 173–184, doi:10.1007/s002130050755.
38. King, D.J.; Link, C.G.; Kowalczyk, B. A Comparison of Bd and Tid Dose Regimens of Quetiapine (Seroquel) in the Treatment of Schizophrenia. *Psychopharmacology (Berl)* **1998**, *137*, 139–146, doi:10.1007/s002130050603.
39. Arvanitis, L.A.; Miller, B.G. Multiple Fixed Doses of “Seroquel” (Quetiapine) in Patients with Acute Exacerbation of Schizophrenia: A Comparison with Haloperidol and Placebo. The Seroquel Trial 13 Study Group. *Biol. Psychiatry* **1997**, *42*, 233–246, doi:10.1016/s0006-3223(97)00190-x.
40. Beasley, C.M.J.; Hamilton, S.H.; Crawford, A.M.; Dellva, M.A.; Tollefson, G.D.; Tran, P.V.; Blin, O.; Beuzen, J.N. Olanzapine versus Haloperidol: Acute Phase Results of the International Double-Blind Olanzapine Trial. *Eur. Neuropsychopharmacol. J. Eur. Coll. Neuropsychopharmacol.* **1997**, *7*, 125–137, doi:10.1016/s0924-977x(96)00392-6.
41. Peuskens, J.; Link, C.G. A Comparison of Quetiapine and Chlorpromazine in the Treatment of Schizophrenia. *Acta Psychiatr. Scand.* **1997**, *96*, 265–273, doi:10.1111/j.1600-0447.1997.tb10162.x.
42. Small, J.G.; Hirsch, S.R.; Arvanitis, L.A.; Miller, B.G.; Link, C.G. Quetiapine in Patients with Schizophrenia. A High- and Low-Dose Double-Blind Comparison with Placebo. Seroquel Study Group. *Arch. Gen. Psychiatry* **1997**, *54*, 549–557, doi:10.1001/archpsyc.1997.01830180067009.

43. Tollefson, G.D.; Beasley, C.M.J.; Tran, P.V.; Street, J.S.; Krueger, J.A.; Tamura, R.N.; Graffeo, K.A.; Thieme, M.E. Olanzapine versus Haloperidol in the Treatment of Schizophrenia and Schizoaffective and Schizophreniform Disorders: Results of an International Collaborative Trial. *Am. J. Psychiatry* **1997**, *154*, 457–465, doi:10.1176/ajp.154.4.457.
44. Tran, P.V.; Hamilton, S.H.; Kuntz, A.J.; Potvin, J.H.; Andersen, S.W.; Beasley, C.J.; Tollefson, G.D. Double-Blind Comparison of Olanzapine versus Risperidone in the Treatment of Schizophrenia and Other Psychotic Disorders. *J. Clin. Psychopharmacol.* **1997**, *17*, 407–418, doi:10.1097/00004714-199710000-00010.
45. Beasley, C.M.J.; Sanger, T.; Satterlee, W.; Tollefson, G.; Tran, P.; Hamilton, S. Olanzapine versus Placebo: Results of a Double-Blind, Fixed-Dose Olanzapine Trial. *Psychopharmacology (Berl)* **1996**, *124*, 159–167, doi:10.1007/BF02245617.
46. Litman, R.E.; Smith, M.A.; Doherty, J.J.; Cross, A.; Raines, S.; Gertsik, L.; Zukin, S.R. AZD8529, a Positive Allosteric Modulator at the MGluR2 Receptor, Does Not Improve Symptoms in Schizophrenia: A Proof of Principle Study. *Schizophr. Res.* **2016**, *172*, 152–157, doi:10.1016/j.schres.2016.02.001.
47. Beasley, C.M.J.; Tollefson, G.; Tran, P.; Satterlee, W.; Sanger, T.; Hamilton, S. Olanzapine versus Placebo and Haloperidol: Acute Phase Results of the North American Double-Blind Olanzapine Trial. *Neuropsychopharmacol. Off. Publ. Am. Coll. Neuropsychopharmacol.* **1996**, *14*, 111–123, doi:10.1016/0893-133X(95)00069-P.
48. Blin, O.; Azorin, J.M.; Bouhours, P. Antipsychotic and Anxiolytic Properties of Risperidone, Haloperidol, and Methotrimeprazine in Schizophrenic Patients. *J. Clin. Psychopharmacol.* **1996**, *16*, 38–44, doi:10.1097/00004714-199602000-00007.
49. Borison, R.L.; Arvanitis, L.A.; Miller, B.G. ICI 204,636, an Atypical Antipsychotic: Efficacy and Safety in a Multicenter, Placebo-Controlled Trial in Patients with Schizophrenia. U.S. SEROQUEL Study Group. *J. Clin. Psychopharmacol.* **1996**, *16*, 158–169, doi:10.1097/00004714-199604000-00008.
50. Huttunen, M.O.; Piepponen, T.; Rantanen, H.; Larmo, I.; Nyholm, R.; Raitasuo, V. Risperidone versus Zuclopenthixol in the Treatment of Acute Schizophrenic Episodes: A Double-Blind Parallel-Group Trial. *Acta Psychiatr. Scand.* **1995**, *91*, 271–277, doi:10.1111/j.1600-0447.1995.tb09781.x.
51. Peuskens, J. Risperidone in the Treatment of Patients with Chronic Schizophrenia: A Multi-National, Multi-Centre, Double-Blind, Parallel-Group Study versus Haloperidol. Risperidone Study Group. *Br. J. Psychiatry* **1995**, *166*, 712–733, doi:10.1192/bjp.166.6.712.
52. Marder, S.R.; Meibach, R.C. Risperidone in the Treatment of Schizophrenia. *Am. J. Psychiatry* **1994**, *151*, 825–835, doi:10.1176/ajp.151.6.825.
53. Cesková, E.; Svestka, J. Double-Blind Comparison of Risperidone and Haloperidol in Schizophrenic and Schizoaffective Psychoses. *Pharmacopsychiatry* **1993**, *26*, 121–124.
54. Chouinard, G.; Jones, B.; Remington, G.; Bloom, D.; Addington, D.; MacEwan, G.W.; Labelle, A.; Beauclair, L.; Arnott, W. A Canadian Multicenter Placebo-Controlled Study of Fixed Doses of Risperidone and Haloperidol in the Treatment of Chronic Schizophrenic Patients. *J. Clin. Psychopharmacol.* **1993**, *13*, 25–40.
55. Høyberg, O.J.; Fensbo, C.; Remvig, J.; Lingjaerde, O.; Sloth-Nielsen, M.; Salvesen, I. Risperidone versus Perphenazine in the Treatment of Chronic Schizophrenic Patients with Acute Exacerbations. *Acta Psychiatr. Scand.* **1993**, *88*, 395–402, doi:10.1111/j.1600-0447.1993.tb03480.x.
56. Malla, A.; Chue, P.; Jordan, G.; Stip, E.; Kocerginski, D.; Milliken, H.; Joseph, A.; Williams, R.; Adams, B.; Manchanda, R.; et al. An Exploratory, Open-Label, Randomized Trial Comparing Risperidone Long-Acting Injectabl with Oral Antipsychotic Medication in the Treatment of Early Psychosis. *Clin. Schizophr. Relat. Psychoses* **2016**, *9*, 198–208, doi:10.3371/CSRP.MACH.061213.
57. Nasser, A.F.; Henderson, D.C.; Fava, M.; Fudala, P.J.; Twumasi-Ankrah, P.; Kouassi, A.; Heidbreder, C. Efficacy, Safety, and Tolerability of RBP-7000 Once-Monthly Risperidone for the Treatment of Acute Schizophrenia: An 8-Week, Randomized, Double-Blind, Placebo-Controlled, Multicenter Phase 3 Study. *J. Clin. Psychopharmacol.* **2016**, *36*, 130–140, doi:10.1097/JCP.0000000000000479.

58. Parabiaghi, A.; Tettamanti, M.; D'Avanzo, B.; Barbato, A. Metabolic Syndrome and Drug Discontinuation in Schizophrenia: A Randomized Trial Comparing Aripiprazole Olanzapine and Haloperidol. *Acta Psychiatr. Scand.* **2016**, *133*, 63–75, doi:10.1111/acps.12468.
59. Buckley, P.F.; Schooler, N.R.; Goff, D.C.; Hsiao, J.; Kopelowicz, A.; Lauriello, J.; Manschreck, T.; Mendelowitz, A.J.; Miller, D.D.; Severe, J.B.; et al. Comparison of SGA Oral Medications and a Long-Acting Injectable SGA: The PROACTIVE Study. *Schizophr. Bull.* **2015**, *41*, 449–459, doi:10.1093/schbul/sbu067.
60. Ishigooka, J.; Nakamura, J.; Fujii, Y.; Iwata, N.; Kishimoto, T.; Iyo, M.; Uchimura, N.; Nishimura, R.; Shimizu, N. Efficacy and Safety of Aripiprazole Once-Monthly in Asian Patients with Schizophrenia: A Multicenter, Randomized, Double-Blind, Non-Inferiority Study versus Oral Aripiprazole. *Schizophr. Res.* **2015**, *161*, 421–428, doi:10.1016/j.schres.2014.12.013.
61. Cheng, Z.; Yuan, Y.; Han, X.; Yang, L.; Zeng, X.; Yang, F.; Lu, Z.; Wang, C.; Deng, H.; Zhao, J.; et al. Rates and Predictors of One-Year Antipsychotic Treatment Discontinuation in First-Episode Schizophrenia: Results from an Open-Label, Randomized, “Real World” Clinical Trial. *Psychiatry Res.* **2019**, *273*, 631–640, doi:10.1016/j.psychres.2019.01.068.
62. Meltzer, H.Y.; Risinger, R.; Nasrallah, H.A.; Du, Y.; Zummo, J.; Corey, L.; Bose, A.; Stankovic, S.; Silverman, B.L.; Ehrich, E.W. A Randomized, Double-Blind, Placebo-Controlled Trial of Aripiprazole Lauroxil in Acute Exacerbation of Schizophrenia. *J. Clin. Psychiatry* **2015**, *76*, 1085–1090, doi:10.4088/JCP.14m09741.
63. Moosavi, S.M.; Ahmadi, M.; Mojtahedi, D.; Yazdani, J.; Monajemi, M.B. Comparison of Quetiapine and Risperidone in Treatment of Acute Psychosis: A Double-Blind, Randomized-Controlled Study. *Glob. J. Health Sci.* **2015**, *7*, 359–363, doi:10.5539/gjhs.v7n5p359.
64. Naber, D.; Hansen, K.; Forray, C.; Baker, R.A.; Sapin, C.; Beillat, M.; Peters-Strickland, T.; Nylander, A.G.; Hertel, P.; Andersen, H.S.; et al. Qualify: A Randomized Head-to-Head Study of Aripiprazole Once-Monthly and Paliperidone Palmitate in the Treatment of Schizophrenia. *Schizophr. Res.* **2015**, *168*, 498–504, doi:10.1016/j.schres.2015.07.007.
65. Robinson, D.G.; Gallego, J.A.; John, M.; Petrides, G.; Hassoun, Y.; Zhang, J.P.; Lopez, L.; Braga, R.J.; Sevy, S.M.; Addington, J.; et al. A Randomized Comparison of Aripiprazole and Risperidone for the Acute Treatment of First-Episode Schizophrenia and Related Disorders: 3-Month Outcomes. *Schizophr. Bull.* **2015**, *41*, 1227–1236, doi:10.1093/schbul/sbv125.
66. Subotnik, K.L.; Casaus, L.R.; Ventura, J.; Luo, J.S.; Helleman, G.S.; Gretchen-Doorly, D.; Marder, S.; Nuechterlein, K.H. Long-Acting Injectable Risperidone for Relapse Prevention and Control of Breakthrough Symptoms after a Recent First Episode of Schizophrenia: A Randomized Clinical Trial. *JAMA Psychiatry* **2015**, *72*, 822–829, doi:10.1001/jamapsychiatry.2015.0270.
67. Tybura, P.; Trzeźniowska-Drukała, B.; Bienkowski, P.; Beszlej, A.; Frydecka, D.; Mierzejewski, P.; Samochowiec, A.; Grzywacz, A.; Samochowiec, J. Pharmacogenetics of Adverse Events in Schizophrenia Treatment: Comparison Study of Ziprasidone, Olanzapine and Perazine. *Psychiatry Res.* **2014**, *219*, 261–267, doi:10.1016/j.psychres.2014.05.039.
68. Durgam, S.; Starace, A.; Li, D.; Migliore, R.; Ruth, A.; Németh, G.; Laszlovszky, I. An Evaluation of the Safety and Efficacy of Cariprazine in Patients with Acute Exacerbation of Schizophrenia: A Phase II, Randomized Clinical Trial. *Schizophr. Res.* **2014**, *152*, 450–457, doi:10.1016/j.schres.2013.11.041.
69. Hatta, K.; Otachi, T.; Fujita, K.; Morikawa, F.; Ito, S.; Tomiyama, H.; Abe, T.; Sudo, Y.; Takebayashi, H.; Yamashita, T.; et al. Antipsychotic Switching versus Augmentation among Early Non-Responders to Risperidone or Olanzapine in Acute-Phase Schizophrenia. *Schizophr. Res.* **2014**, *158*, 213–222, doi:10.1016/j.schres.2014.07.015.
70. Li, H.; Luo, J.; Wang, C.; Xie, S.; Xu, X.; Wang, X.; Yu, W.; Gu, N.; Kane, J.M. Efficacy and Safety of Aripiprazole in Chinese Han Schizophrenia Subjects: A Randomized, Double-Blind, Active Parallel-Controlled, Multicenter Clinical Trial. *Schizophr. Res.* **2014**, *157*, 112–119, doi:10.1016/j.schres.2014.05.040.



71. Mirabzadeh, A.; Kimiaghali, P.; Fadai, F.; Samiei, M.; Daneshmand, R. The Therapeutic Effectiveness of Risperidone on Negative Symptoms of Schizophrenia in Comparison with Haloperidol: A Randomized Clinical Trial. *Basic Clin. Neurosci.* **2014**, *5*, 212–7.
72. Jena, M.; Ranjan, R.; Mishra, B.R.; Mishra, A.; Nath, S.; Sahu, P.; Meher, B.R.; Srinivasan, A.; Maiti, R. Effect of Lurasidone vs Olanzapine on Neurotrophic Biomarkers in Unmedicated Schizophrenia: A Randomized Controlled Trial. *J. Psychiatr. Res.* **2019**, *112*, 1–6, doi:10.1016/j.jpsychires.2019.02.007.
73. Shen, J.H.Q.; Zhao, Y.; Rosenzweig-Lipson, S.; Popp, D.; Williams, J.B.W.; Giller, E.; Detke, M.J.; Kane, J.M. A 6-Week Randomized, Double-Blind, Placebo-Controlled, Comparator Referenced Trial of Vabicaserin in Acute Schizophrenia. *J. Psychiatr. Res.* **2014**, *53*, 14–22, doi:10.1016/j.jpsychires.2014.02.012.
74. Shojia Shafti, S.; Gilanipoor, M. A Comparative Study between Olanzapine and Risperidone in the Management of Schizophrenia. *Schizophr. Res. Treat.* **2014**, *2014*, 1–5, doi:10.1155/2014/307202.
75. Amr, M.; Lakhan, S.E.; Sanhan, S.; Al-Rhaddad, D.; Hassan, M.; Thiab, M.; Shams, T. Efficacy and Tolerability of Quetiapine versus Haloperidol in First-Episode Schizophrenia: A Randomized Clinical Trial. *Int. Arch. Med.* **2013**, *6*, 1–8, doi:10.1186/1755-7682-6-47.
76. Wang, C.H.; Li, Y.; Yang, J.; Su, L.Y.; Geng, Y.G.; Li, H.; Wang, J.K.; Mu, J.L. A Randomized Controlled Trial of Olanzapine Improving Memory Deficits in Han Chinese Patients with First-Episode Schizophrenia. *Schizophr. Res.* **2013**, *144*, 129–135, doi:10.1016/j.schres.2012.12.021.
77. Chung, T.S.; Lung, F.W. Different Impacts of Aquaporin 4 and MAOA Allele Variation among Olanzapine, Risperidone, and Paliperidone in Schizophrenia. *J. Clin. Psychopharmacol.* **2012**, *32*, 394–397, doi:10.1097/JCP.0b013e31825370f4.
78. Jindal, K.C.; Singh, G.P.; Munjal, V. Aripiprazole versus Olanzapine in the Treatment of Schizophrenia: A Clinical Study from India. *Int. J. Psychiatry Clin. Pract.* **2013**, *17*, 21–29, doi:10.3109/13651501.2011.653376.
79. Kane, J.M.; Sanchez, R.; Perry, P.P.; Jin, N.; Johnson, B.R.; Forbes, R.A.; McQuade, R.D.; Carson, W.H.; Fleischacker, W.W. Aripiprazole Intramuscular Depot as Maintenance Treatment in Patients with Schizophrenia: A 52-Week, Multicenter, Randomized, Double-Blind, Placebo-Controlled Study. *J. Clin. Psychiatry* **2012**, *73*, 617–624, doi:10.4088/JCP.11m07530.
80. Kwon, J.S.; Mittoux, A.; Hwang, J.Y.; Ong, A.; Cai, Z.J.; Su, T.P. The Efficacy and Safety of 12 Weeks of Treatment with Sertindole or Olanzapine in Patients with Chronic Schizophrenia Who Did Not Respond Successfully to Their Previous Treatments: A Randomized, Double-Blind, Parallel-Group, Flexible-Dose Study. *Int. Clin. Psychopharmacol.* **2012**, *27*, 326–335, doi:10.1097/YIC.0b013e32835767a0.
81. Li, Y.; Li, H.; Liu, Y.; Yan, X.; Yue, Y.; Qian, M. Comparison of Quetiapine and Risperidone in Chinese Han Patients with Schizophrenia: Results of a Single-Blind, Randomized Study. *Curr. Med. Res. Opin.* **2012**, *28*, 1725–1732, doi:10.1185/03007995.2012.728524.
82. Pawar, G.R.; Phadnis, P.; Paliwal, A. Evaluation of Efficacy, Safety, and Cognitive Profile of Amisulpride Per Se and Its Comparison with Olanzapine in Newly Diagnosed Schizophrenic Patients in an 8-Week, Double-Blind, Single-Centre, Prospective Clinical Trial. *ISRN Psychiatry* **2012**, *2012*, 1–5, doi:10.5402/2012/703751.
83. Pu, Z.P.; Li, G.R.; Zou, Z.P.; Tao, F.; Hu, S.H. A Randomized, 8-Week Study of the Effects of Extended-Release Paliperidone and Olanzapine on Heart Rate Variability in Patients with Schizophrenia. *J. Clin. Psychopharmacol.* **2019**, *39*, 243–248, doi:10.1097/JCP.0000000000001023.
84. Witte, M.M.; Case, M.G.; Schuh, K.J.; Ascher-Svanum, H. Effects of Olanzapine Long-Acting Injection on Levels of Functioning among Acutely Ill Patients with Schizophrenia. *Curr. Med. Res. Opin.* **2012**, *28*, 315–323, doi:10.1185/03007995.2012.657300.
85. Grootens, K.P.; Van Veelen, N.M.J.; Peuskens, J.; Sabbe, B.G.C.; Thys, E.; Buitelaar, J.K.; Verkes, R.J.; Kahn, R.S. Ziprasidone vs Olanzapine in Recent-Onset Schizophrenia and Schizoaffective Disorder: Results of an 8-Week Double-Blind Randomized Controlled Trial. *Schizophr. Bull.* **2011**, *37*, 352–361, doi:10.1093/schbul/sbp037.

86. Harvey, P.D.; Ogasa, M.; Cucchiaro, J.; Loebel, A.; Keefe, R.S.E. Performance and Interview-Based Assessments of Cognitive Change in a Randomized, Double-Blind Comparison of Lurasidone vs. Ziprasidone. *Schizophr. Res.* **2011**, *127*, 188–194, doi:10.1016/j.schres.2011.01.004.
87. Li, H.; Rui, Q.; Ning, X.; Xu, H.; Gu, N. A Comparative Study of Paliperidone Palmitate and Risperidone Long-Acting Injectable Therapy in Schizophrenia. *Prog. Neuro-Psychopharmacol. Biol. Psychiatry* **2011**, *35*, 1002–1008, doi:10.1016/j.pnpbp.2011.02.001.
88. Meltzer, H.Y.; Cucchiaro, J.; Silva, R.; Ogasa, M.; Phillips, D.; Xu, J.; Kalali, A.H.; Schweizer, E.; Pikalov, A.; Loebel, A. Lurasidone in the Treatment of Schizophrenia: A Randomized, Double-Blind, Placebo- and Olanzapine-Controlled Study. *Am. J. Psychiatry* **2011**, *168*, 957–967, doi:10.1176/appi.ajp.2011.10060907.
89. Shah, S.; Joshi, D. Tolerability and Efficacy of Paliperidone ER Compared to Olanzapine in the Treatment of Schizophrenia: A Randomized, Double-Blind, Multicentric Trial. *Ind. Psychiatry J.* **2012**, *20*, 25, doi:10.4103/0972-6748.98411.
90. Xiang, Y.T.; Wang, C.Y.; Ungvari, G.S.; Kreyenbuhl, J.A.; Chiu, H.F.K.; Lai, K.Y.C.; Lee, E.H.M.; Bo, Q.J.; Dixon, L.B. Weight Changes and Their Associations with Demographic and Clinical Characteristics in Risperidone Maintenance Treatment for Schizophrenia. *Pharmacopsychiatry* **2011**, *44*, 135–141, doi:10.1055/s-0031-1277178.
91. Zhang, Shu; Bruce Parsons; Yu, Gu, N.; Ma Double-Blind Comparison of Ziprasidone and Risperidone in the Treatment of Chinese Patients with Acute Exacerbation of Schizophrenia. *Neuropsychiatr. Dis. Treat.* **2011**, *77*, doi:10.2147/ndt.s16664.
92. Bhowmick, S.; Hazra, A.; Ghosh, M. Amisulpride versus Olanzapine in the Treatment of Schizophrenia in Indian Patients: Randomized Controlled Trial. *Aust. N. Z. J. Psychiatry* **2010**, *44*, 237–242, doi:10.3109/00048670903487134.
93. Chen, E.Y.H.; Hui, C.L.M.; Lam, M.M.L.; Chiu, C.P.Y.; Law, C.W.; Chung, D.W.S.; Tso, S.; Pang, E.P.F.; Chan, K.T.; Wong, Y.C.; et al. Maintenance Treatment with Quetiapine versus Discontinuation after One Year of Treatment in Patients with Remitted First Episode Psychosis: Randomised Controlled Trial. *BMJ* **2010**, *341*, doi:10.1136/bmj.c4024.
94. Chen, Y.L.; Chen, K.P.; Chiu, C.C.; Tai, M.H.; Lung, F.W. Early Predictors of Poor Treatment Response in Patients with Schizophrenia Treated with Atypical Antipsychotics. *BMC Psychiatry* **2018**, *18*, 1–8, doi:10.1186/s12888-018-1950-1.
95. Gaebel, W.; Schreiner, A.; Bergmans, P.; De Arce, R.; Rouillon, F.; Cordes, J.; Eriksson, L.; Smeraldi, E. Relapse Prevention in Schizophrenia and Schizoaffective Disorder with Risperidone Long-Acting Injectable vs Quetiapine: Results of a Long-Term, Open-Label, Randomized Clinical Trial. *Neuropsychopharmacology* **2010**, *35*, 2367–2377, doi:10.1038/npp.2010.111.
96. Johnsen, E.; Kroken, R.A.; Wentzel-Larsen, T.; Jørgensen, H.A. Effectiveness of Second-Generation Antipsychotics: A Naturalistic, Randomized Comparison of Olanzapine, Quetiapine, Risperidone, and Ziprasidone. *BMC Psychiatry* **2010**, *10*, doi:10.1186/1471-244X-10-26.
97. MacFadden, W.; Ma, Y.W.; Thomas Haskins, J.; Bossie, C.A.; Alphs, L. A Prospective Study Comparing the Long-Term Effectiveness of Injectable Risperidone Long-Acting Therapy and Oral Aripiprazole in Patients with Schizophrenia. *Psychiatry (Edgemont)* **2010**, *7*, 23–31.
98. Pandina, G.; Lane, R.; Gopal, S.; Gassmann-Mayer, C.; Hough, D.; Remmerie, B.; Simpson, G. A Double-Blind Study of Paliperidone Palmitate and Risperidone Long-Acting Injectable in Adults with Schizophrenia. *Prog. Neuro-Psychopharmacol. Biol. Psychiatry* **2011**, *35*, 218–226, doi:10.1016/j.pnpbp.2010.11.008.
99. Roberts, D.L.; Penn, D.L.; Corrigan, P.; Lipkovich, I.; Kinon, B.; Black, R.A. Antipsychotic Medication and Social Cue Recognition in Chronic Schizophrenia. *Psychiatry Res.* **2010**, *178*, 46–50, doi:10.1016/j.psychres.2010.04.006.
100. Fleischhacker, W.W.; McQuade, R.D.; Marcus, R.N.; Archibald, D.; Swanink, R.; Carson, W.H. A Double-Blind, Randomized Comparative Study of Aripiprazole and Olanzapine in Patients with Schizophrenia. *Biol. Psychiatry* **2009**, *65*, 510–517, doi:10.1016/j.biopsych.2008.07.033.

101. Hatta, K.; Sato, K.; Hamakawa, H.; Takebayashi, H.; Kimura, N.; Ochi, S.; Sudo, Y.; Asukai, N.; Nakamura, H.; Usui, C.; et al. Effectiveness of Second-Generation Antipsychotics with Acute-Phase Schizophrenia. *Schizophr. Res.* **2009**, *113*, 49–55, doi:10.1016/j.schres.2009.05.030.
102. Lublin, H.; Haug, H.J.; Koponen, H.; Sigmundsson, T.; Kolb, S.A. Ziprasidone versus Olanzapine, Risperidone or Quetiapine in Patients with Chronic Schizophrenia: A 12-Week Open-Label, Multicentre Clinical Trial. *World J. Biol. Psychiatry* **2009**, *10*, 710–718, doi:10.1080/15622970802269589.
103. Oliveira, I.R.; Elkis, H.; Gattaz, W.F.; Chaves, A.C.; Sena, de E.P.; Souza, F.G. de M.; Campos, J.A.; Bueno, J.R.; Silva, J.A.C.; Louzã, M.R.; et al. Aripiprazole for Patients with Schizophrenia and Schizoaffective Disorder: An Open-Label, Randomized, Study versus Haloperidol. *CNS Spectr.* **2009**, *14*, 93–102, doi:10.1017/S1092852900000249.
104. Cutler, A.J.; Kalali, A.H.; Weiden, P.J.; Hamilton, J.; Wolfgang, C.D. Four-Week, Double-Blind, Placebo- and Ziprasidone-Controlled Trial of Iloperidone in Patients with Acute Exacerbations of Schizophrenia. *J. Clin. Psychopharmacol.* **2008**, *28*, 20–28, doi:10.1097/JCP.0b013e318169d4ce.
105. Gómez-Revuelta, M.; Pelayo-Terán, J.M.; Juncal-Ruiz, M.; Ortiz-García de la Foz, V.; Vázquez-Bourgon, J.; González-Pinto, A.; Crespo-Facorro, B. Long-Term Antipsychotic Effectiveness in First Episode of Psychosis: A 3-Year Follow-up Randomized Clinical Trial Comparing Aripiprazole, Quetiapine, and Ziprasidone. *Int. J. Neuropsychopharmacol.* **2018**, *21*, 1090–1101, doi:10.1093/ijnp/pyy082.
106. Jerrell, J.M.; Ramirez, P.M. Changes in Neuropsychological Functioning Following Treatment with Risperidone, Olanzapine, and Conventional Antipsychotic Medications. *Hum. Psychopharmacol. Clin. Exp.* **2008**, *23*, 595–604, doi:10.1002/hup.967.
107. Kahn, R.S.; Fleischhacker, W.W.; Boter, H.; Davidson, M.; Vergouwe, Y.; Keet, I.P.; Gheorghe, M.D.; Rybakowski, J.K.; Galderisi, S.; Libiger, J.; et al. Effectiveness of Antipsychotic Drugs in First-Episode Schizophrenia and Schizophreniform Disorder: An Open Randomised Clinical Trial. *Lancet* **2008**, *371*, 1085–1097, doi:10.1016/S0140-6736(08)60486-9.
108. Kolotkin, R.L.; Corey-Lisle, P.K.; Crosby, R.D.; Kan, H.J.; McQuade, R.D. Changes in Weight and Weight-Related Quality of Life in a Multicentre, Randomized Trial of Aripiprazole versus Standard of Care. *Eur. Psychiatry* **2008**, *23*, 561–566, doi:10.1016/j.eurpsy.2008.01.1421.
109. Nimwegen, L.J.; De Haan, L.; Van Beveren, N.J.M.; Van Der Helm, M.; Van Den Brink, W.; Linszen, D. Effect of Olanzapine and Risperidone on Subjective Well-Being and Craving for Cannabis in Patients with Schizophrenia or Related Disorders: A Double-Blind Randomized Controlled Trial. *Can. J. Psychiatry* **2008**, *53*, 400–405, doi:10.1177/070674370805300610.
110. Sacchetti, E.; Valsecchi, P.; Parrinello, G. A Randomized, Flexible-Dose, Quasi-Naturalistic Comparison of Quetiapine, Risperidone, and Olanzapine in the Short-Term Treatment of Schizophrenia: The QUERISOLA Trial. *Schizophr. Res.* **2008**, *98*, 55–65, doi:10.1016/j.schres.2007.09.011.
111. Safa, M.; Sadr, S.; Delfan, B.; Saki, M.; Javad Tarrahi, M. Metabolic Effects of Olanzapine and Risperidone in Patients with Psychotic Disorders. *Int. J. Psychiatry Clin. Pract.* **2008**, *12*, 299–302, doi:10.1080/13651500802155337.
112. Dossenbach, M.; Treuer, T.; Kryzhanovskaya, L.; Saylan, M.; Dominguez, S.; Huang, X. Olanzapine versus Chlorpromazine in the Treatment of Schizophrenia: A Pooled Analysis of Four 6-Week, Randomized, Open-Label Studies in the Middle East and North Africa. *J. Clin. Psychopharmacol.* **2007**, *27*, 329–337, doi:10.1097/JCP.0b013e3180ca83b1.
113. Goldberg, T.E.; Goldman, R.S.; Burdick, K.E.; Malhotra, A.K.; Lencz, T.; Patel, R.C.; Woerner, M.G.; Schooler, N.R.; Kane, J.M.; Robinson, D.G. Cognitive Improvement after Treatment with Second-Generation Antipsychotic Medications in First-Episode Schizophrenia: Is It a Practice Effect? *Arch. Gen. Psychiatry* **2007**, *64*, 1115–1122, doi:10.1001/archpsyc.64.10.1115.

114. Kane, J.M.; Canas, F.; Kramer, M.; Ford, L.; Gassmann-Mayer, C.; Lim, P.; Eerdekens, M. Treatment of Schizophrenia with Paliperidone Extended-Release Tablets: A 6-Week Placebo-Controlled Trial. *Schizophr. Res.* **2007**, *90*, 147–161, doi:10.1016/j.schres.2006.09.012.
115. Marder, S.R.; Kramer, M.; Ford, L.; Eerdekens, E.; Lim, P.; Eerdekens, M.; Lowy, A. Efficacy and Safety of Paliperidone Extended-Release Tablets: Results of a 6-Week, Randomized, Placebo-Controlled Study. *Biol. Psychiatry* **2007**, *62*, 1363–1370, doi:10.1016/j.biopsych.2007.01.017.
116. Schennach, R.; Riedel, M.; Spellmann, I.; Musil, R.; Obermeier, M.; Jäger, M.; Bottlender, R.; Schmauss, M.; Laux, G.; Möller, H.J. Comparing Schizophrenia Patients with a Predicted High/Low Risk of Nonresponse Receiving Treatment with Ziprasidone and Haloperidol: A Randomized-Controlled Study. *Pharmacopsychiatry* **2019**, *52*, 180–185, doi:10.1055/a-0669-9461.
117. McEvoy, J.P.; Daniel, D.G.; Carson, W.H.; McQuade, R.D.; Marcus, R.N. A Randomized, Double-Blind, Placebo-Controlled, Study of the Efficacy and Safety of Aripiprazole 10, 15 or 20 Mg/Day for the Treatment of Patients with Acute Exacerbations of Schizophrenia. *J. Psychiatr. Res.* **2007**, *41*, 895–905, doi:10.1016/j.jpsychires.2007.05.002.
118. Zimbroff, D.; Warrington, L.; Loebel, A.; Yang, R.; Siu, C. Comparison of Ziprasidone and Aripiprazole in Acutely Ill Patients with Schizophrenia or Schizoaffective Disorder: A Randomized, Double-Blind, 4-Week Study. *Int. Clin. Psychopharmacol.* **2007**, *22*, 363–370, doi:10.1097/YIC.0b013e32816f7779.
119. Azorin, J.M.; Strub, N.; Loft, H. A Double-Blind, Controlled Study of Sertindole versus Risperidone in the Treatment of Moderate-to-Severe Schizophrenia. *Int. Clin. Psychopharmacol.* **2006**, *21*, 49–56, doi:10.1097/01.yic.0000177020.26311.a7.
120. Cutler, A.J.; Marcus, R.N.; Hardy, S.A.; O'Donnell, A.; Carson, W.H.; McQuade, R.D. The Efficacy and Safety of Lower Doses of Aripiprazole for the Treatment of Patients with Acute Exacerbation of Schizophrenia. *CNS Spectr.* **2006**, *11*, 691–702, doi:10.1017/S1092852900014784.
121. Harvey, P.D. Improvement in Social Competence With Short-Term Atypical Antipsychotic Treatment: A Randomized, Double-Blind Comparison of Quetiapine Versus Risperidone for Social Competence, Social Cognition, and Neuropsychological Functioning. *Am. J. Psychiatry* **2006**, *163*, 1918, doi:10.1176/appi.ajp.163.11.1918.
122. Harvey, P.D. Neuropsychological Normalization With Long-Term Atypical Antipsychotic Treatment: Results of a Six-Month Randomized, Double-Blind Comparison of Ziprasidone vs. Olanzapine. *J. Neuropsychiatr.* **2006**, *18*, 54–63, doi:10.1176/appi.neuropsych.18.1.54.
123. Kinon, B.J.; Noordsy, D.L.; Liu-Seifert, H.; Gulliver, A.H.; Ascher-Svanum, H.; Kollack-Walker, S. Randomized, Double-Blind 6-Month Comparison of Olanzapine and Quetiapine in Patients with Schizophrenia or Schizoaffective Disorder with Prominent Negative Symptoms and Poor Functioning. *J. Clin. Psychopharmacol.* **2006**, *26*, 453–461, doi:10.1097/01.jcp.0000236658.16286.25.
124. Lecrubier, Y.; Quintin, P.; Bouhassira, M.; Perrin, E.; Lancrenon, S. The Treatment of Negative Symptoms and Deficit States of Chronic Schizophrenia: Olanzapine Compared to Amisulpride and Placebo in a 6-Month Double-Blind Controlled Clinical Trial. *Acta Psychiatr. Scand.* **2006**, *114*, 319–327, doi:10.1111/j.1600-0447.2006.00887.x.
125. McCue, R.E.; Waheed, R.; Urcuyo, L.; Orendain, G.; Joseph, M.D.; Charles, R.; Hasan, S.M. Comparative Effectiveness of Second-Generation Antipsychotics and Haloperidol in Acute Schizophrenia. *Br. J. Psychiatry* **2006**, *189*, 433–440, doi:10.1192/bjp.bp.105.019307.
126. Brook, S.; Walden, J.; Benattia, I.; Siu, C.O.; Romano, S.J. Ziprasidone and Haloperidol in the Treatment of Acute Exacerbation of Schizophrenia and Schizoaffective Disorder: Comparison of Intramuscular and Oral Formulations in a 6-Week, Randomized, Blinded-Assessment Study. *Psychopharmacology (Berl)* **2005**, *178*, 514–523, doi:10.1007/s00213-004-2082-5.

127. Huang, M.; Yu, L.; Pan, F.; Lu, S.; Hu, S.; Hu, J.; Chen, J.; Jin, P.; Qi, H.; Xu, Y. A Randomized, 13-Week Study Assessing the Efficacy and Metabolic Effects of Paliperidone Palmitate Injection and Olanzapine in First-Episode Schizophrenia Patients. *Prog. Neuro-Psychopharmacol. Biol. Psychiatry* **2018**, *81*, 122–130, doi:10.1016/j.pnpbp.2017.10.021.
128. Chue, P.; Eerdekens, M.; Augustyns, I.; Lachaux, B.; Molcan, P.; Eriksson, L.; Pretorius, H.; David, A.S. Comparative Efficacy and Safety of Long-Acting Risperidone and Risperidone Oral Tablets. *Eur. Neuropsychopharmacol. J. Eur. Coll. Neuropsychopharmacol.* **2005**, *15*, 111–117, doi:10.1016/j.euroneuro.2004.07.003.
129. Lieberman, J.A.; Scott Stroup, T.; McEvoy, J.P.; Swartz, M.S.; Rosenheck, R.A.; Perkins, D.O.; Keefe, R.S.E.; Davis, S.M.; Davis, C.E.; Lebowitz, B.D.; et al. Effectiveness of Antipsychotic Drugs in Patients with Chronic Schizophrenia. *N. Engl. J. Med.* **2005**, *353*, 1209–1223, doi:10.1056/NEJMoa051688.
130. Schooler, N.; Rabinowitz, J.; Davidson, M.; Emsley, R.; Harvey, P.D.; Kopala, L.; McGorry, P.D.; Van Hove, I.; Eerdekens, M.; Swyzen, W.; et al. Risperidone and Haloperidol in First-Episode Psychosis: A Long-Term Randomized Trial. *Am. J. Psychiatry* **2005**, *162*, 947–953, doi:10.1176/appi.ajp.162.5.947.
131. Strakowski, S.M.; Johnson, J.L.; DelBello, M.P.; Hamer, R.M.; Green, A.I.; Tohen, M.; Lieberman, J.A.; Glick, I.; Patel, J.K.; Lieberman, J.; et al. Quality of Life during Treatment with Haloperidol or Olanzapine in the Year Following a First Psychotic Episode. *Schizophr. Res.* **2005**, *78*, 161–169, doi:10.1016/j.schres.2005.04.017.
132. Addington, D.E.N.; Pantelis, C.; Dineen, M.; Benattia, I.; Romano, S.J. Efficacy and Tolerability of Ziprasidone versus Risperidone in Patients with Acute Exacerbation of Schizophrenia or Schizoaffective Disorder: An 8-Week, Double-Blind, Multicenter Trial. *J. Clin. Psychiatry* **2004**, *65*, 1624–1633, doi:10.4088/jcp.v65n1207.
133. Appelberg, B.; Tuisku, K.; Joffe, G. Is It Worth While Changing Clinically Stable Schizophrenic Out-Patients with Mild to Moderate Residual Symptoms and/or Side Effects from Conventional to Atypical Antipsychotics? A Prospective, Randomised Study with Olanzapine. *Eur. Psychiatry* **2004**, *19*, 516–518, doi:10.1016/j.eurpsy.2004.06.035.
134. Corrigan, M.H.; Gallen, C.C.; Bonura, M.L.; Merchant, K.M. Effectiveness of the Selective D4 Antagonist Sonepiprazole in Schizophrenia: A Placebo-Controlled Trial. *Biol. Psychiatry* **2004**, *55*, 445–451, doi:10.1016/j.biopsych.2003.10.004.
135. Currier, G.W.; Chou, J.C.-Y.; Feifel, D.; Bossie, C.A.; Turkoz, I.; Mahmoud, R.A.; Gharabawi, G.M. Acute Treatment of Psychotic Agitation: A Randomized Comparison of Oral Treatment with Risperidone and Lorazepam versus Intramuscular Treatment with Haloperidol and Lorazepam. *J. Clin. Psychiatry* **2004**, *65*, 386–394.
136. Daniel, D.G.; Zimbroff, D.L.; Swift, R.H.; Harrigan, E.P. The Tolerability of Intramuscular Ziprasidone and Haloperidol Treatment and the Transition to Oral Therapy. *Int. Clin. Psychopharmacol.* **2004**, *19*, 9–15, doi:10.1097/00004850-200401000-00002.
137. Dossenbach, M.R.K.; Folnegovic-Smalc, V.; Hotujac, L.; Uglesic, B.; Tollefson, G.D.; Grundy, S.L.; Friedel, P.; Jakovljevic, M.M. Double-Blind, Randomized Comparison of Olanzapine versus Fluphenazine in the Long-Term Treatment of Schizophrenia. *Prog. Neuropsychopharmacol. Biol. Psychiatry* **2004**, *28*, 311–318, doi:10.1016/j.pnpbp.2003.10.010.
138. Ismail, Z.; Peters-Strickland, T.; Miguez, M.; Baker, R.A.; Hertel, P.; Eramo, A.; Jin, N.; Perry, P.; Sanchez, R.; McQuade, R.D.; et al. Aripiprazole Once-Monthly in the Treatment of Acute Psychotic Episodes in Schizophrenia: Post Hoc Analysis of Positive and Negative Syndrome Scale Marder Factor Scores. *J. Clin. Psychopharmacol.* **2017**, *37*, 347–350, doi:10.1097/JCP.0000000000000710.
139. Gaebel, W.; Möller, H.J.; Buchkremer, G.; Ohmann, C.; Riesbeck, M.; Wölwer, W.; Von Wilmsdorff, M.; Bottlender, R.; Klingberg, S. Pharmacological Long-Term Treatment Strategies in First Episode Schizophrenia: Study Design and Preliminary Results of an Ongoing RCT within the German Research Network on Schizophrenia. *Eur. Arch. Psychiatry Clin. Neurosci.* **2004**, *254*, 129–140, doi:10.1007/s00406-004-0509-y.
140. Harrigan, E.P.; Miceli, J.J.; Anziano, R.; Watsky, E.; Reeves, K.R.; Cutler, N.R.; Sramek, J.; Shiovitz, T.; Middle, M. A Randomized Evaluation of the Effects of Six Antipsychotic

- Agents on QTc, in the Absence and Presence of Metabolic Inhibition. *J. Clin. Psychopharmacol.* **2004**, 24, 62–69, doi:10.1097/01.jcp.0000104913.75206.62.
141. Kinon, B.J.; Ahl, J.; Rotelli, M.D.; McMullen, E. Efficacy of Accelerated Dose Titration of Olanzapine with Adjunctive Lorazepam to Treat Acute Agitation in Schizophrenia. *Am. J. Emerg. Med.* **2004**, 22, 181–186, doi:10.1016/j.ajem.2004.02.021.
  142. Knegtering, R.; Castelein, S.; Bous, H.; Van Der Linde, J.; Bruggeman, R.; Kluiters, H.; van den Bosch, R.J. A Randomized Open-Label Study of the Impact of Quetiapine versus Risperidone on Sexual Functioning. *J. Clin. Psychopharmacol.* **2004**, 24, 56–61, doi:10.1097/01.jcp.0000106220.36344.04.
  143. Mari, J.J.; Lima, M.S.; Costa, A.N.; Alexandrino, N.; Rodrigues-Filho, S.; de Oliveira, I.R.; Tollefson, G.D. The Prevalence of Tardive Dyskinesia after a Nine Month Naturalistic Randomized Trial Comparing Olanzapine with Conventional Treatment for Schizophrenia and Related Disorders. *Eur. Arch. Psychiatry Clin. Neurosci.* **2004**, 254, 356–361, doi:10.1007/s00406-004-0514-1.
  144. McQuade, R.D.; Stock, E.; Marcus, R.; Jody, D.; Gharbia, N.A.; Vanveggel, S.; Archibald, D.; Carson, W.H. A Comparison of Weight Change during Treatment with Olanzapine or Aripiprazole: Results from a Randomized, Double-Blind Study. *J. Clin. Psychiatry* **2004**, 65 (Suppl. 1), 47–56.
  145. Mortimer, A.; Martin, S.; L  o, H.; Peuskens, J. A Double-Blind, Randomized Comparative Trial of Amisulpride versus Olanzapine for 6 Months in the Treatment of Schizophrenia. *Int. Clin. Psychopharmacol.* **2004**, 19, 63–69, doi:10.1097/00004850-200403000-00002.
  146. Simpson, G.M.; Glick, I.D.; Weiden, P.J.; Romano, S.J.; Siu, C.O. Randomized, Controlled, Double-Blind Multicenter Comparison of the Efficacy and Tolerability of Ziprasidone and Olanzapine in Acutely Ill Inpatients with Schizophrenia or Schizoaffective Disorder. *Am. J. Psychiatry* **2004**, 161, 1837–1847, doi:10.1176/ajp.161.10.1837.
  147. Yamashita, H.; Mori, K.; Nagao, M.; Okamoto, Y.; Morinobu, S.; Yamawaki, S. Effects of Changing from Typical to Atypical Antipsychotic Drugs on Subjective Sleep Quality in Patients with Schizophrenia in a Japanese Population. *J. Clin. Psychiatry* **2004**, 65, 1525–1530, doi:10.4088/jcp.v65n1114.
  148. Beasley, C.M.J.; Sutton, V.K.; Hamilton, S.H.; Walker, D.J.; Dossenbach, M.; Taylor, C.C.; Alaka, K.J.; Bykowski, D.; Tollefson, G.D. A Double-Blind, Randomized, Placebo-Controlled Trial of Olanzapine in the Prevention of Psychotic Relapse. *J. Clin. Psychopharmacol.* **2003**, 23, 582–594, doi:10.1097/01.jcp.0000095348.32154.ec.

**Table S2.** Post hoc analysis/Multiple comparisons—Differences on proportion of women recruited according to trial characteristics.

|                                           | <i>Mean<br/>Difference<br/>(a–b)</i> | <i>Std. Error</i> | <i>Sig.<br/>(p-Value)</i> | <i>95% Confidence Interval</i> |                    |  |
|-------------------------------------------|--------------------------------------|-------------------|---------------------------|--------------------------------|--------------------|--|
|                                           |                                      |                   |                           | <i>Lower Bound</i>             | <i>Upper Bound</i> |  |
| <b>Decade of publication</b>              |                                      |                   |                           |                                |                    |  |
| ≤ 2000 vs. 2001–2010                      | –7.28% *                             | 0.029             | 0.015                     | –0.131                         | –0.015             |  |
| ≤ 2000 vs. ≥ 2011                         | –7.68% *                             | 0.032             | 0.016                     | –0.139                         | –0.014             |  |
| 2001–2010 vs. ≥ 2011                      | –0.40%                               | 0.025             | 0.872                     | –0.053                         | 0.045              |  |
| <b>Funding</b>                            |                                      |                   |                           |                                |                    |  |
| Pharmaceutical vs. Non-pharmaceutical     | –8.80% *                             | 0.029             | 0.003                     | –0.144                         | –0.031             |  |
| <b>Location</b>                           |                                      |                   |                           |                                |                    |  |
| North America vs. Asia                    | –19.44% *                            | 0.030             | <0.001                    | –0.254                         | –0.135             |  |
| North America vs. Europe                  | –13.72% *                            | 0.032             | <0.001                    | –0.200                         | –0.074             |  |
| North America vs. Other                   | –20.11% *                            | 0.062             | 0.002                     | –0.324                         | –0.078             |  |
| North America vs. More than one continent | –8.80% *                             | 0.027             | 0.001                     | –0.142                         | –0.034             |  |
| Asia vs. Europe                           | 5.72%                                | 0.033             | 0.086                     | –0.008                         | 0.123              |  |
| Asia vs. Other                            | –0.66%                               | 0.063             | 0.916                     | –0.131                         | 0.118              |  |
| Asia vs. More than one continent          | 10.64% *                             | 0.029             | <0.001                    | 0.050                          | 0.163              |  |
| Europe vs. Other                          | –6.38%                               | 0.064             | 0.318                     | –0.190                         | 0.062              |  |

|                                     |                                           |           |       |        |        |        |
|-------------------------------------|-------------------------------------------|-----------|-------|--------|--------|--------|
|                                     | <i>Europe vs. More than one continent</i> | 4.92%     | 0.030 | 0.109  | -0.011 | 0.110  |
|                                     | <i>Other vs. More than one continent</i>  | 11.30%    | 0.061 | 0.068  | -0.009 | 0.235  |
| <b>Inclusion criteria for women</b> |                                           |           |       |        |        |        |
|                                     | <i>Yes vs. Not specified</i>              | -6.10% *  | 0.022 | 0.021  | -0.095 | -0.008 |
| <b>Setting</b>                      |                                           |           |       |        |        |        |
|                                     | <i>Inpatient vs. Outpatient</i>           | -6.39% *  | 0.032 | 0.047  | -0.127 | -0.001 |
|                                     | <i>Inpatient vs. Both</i>                 | -6.86% *  | 0.028 | 0.015  | -0.124 | -0.013 |
|                                     | <i>Outpatient vs. Both</i>                | -0.46%    | 0.035 | 0.894  | -0.074 | 0.064  |
| <b>Use of olanzapine</b>            |                                           |           |       |        |        |        |
|                                     | <i>Yes vs. No</i>                         | 6.10% *   | 0.022 | 0.005  | 0.018  | 0.104  |
| <b>Use of FGA</b>                   |                                           |           |       |        |        |        |
|                                     | <i>Yes vs. No</i>                         | -5.00% *  | 0.023 | 0.033  | -0.095 | -0.004 |
| <b>Use of placebo</b>               |                                           |           |       |        |        |        |
|                                     | <i>Yes vs. No</i>                         | -8.60% *  | 0.025 | 0.001  | -0.135 | -0.037 |
| <b>Antipsychotic of interest</b>    |                                           |           |       |        |        |        |
|                                     | <i>Single SGA vs. Multiple SGAs</i>       | -7.80% *  | 0.021 | <0.001 | -0.120 | -0.036 |
| <b>Comparator arm</b>               |                                           |           |       |        |        |        |
|                                     | <i>FGA vs. Only SGAs</i>                  | -7.53% *  | 0.024 | 0.002  | -0.124 | -0.027 |
|                                     | <i>FGA vs. Placebo</i>                    | 3.49%     | 0.033 | 0.299  | -0.031 | 0.101  |
|                                     | <i>FGA vs. FGA + placebo</i>              | 4.98%     | 0.037 | 0.179  | -0.023 | 0.123  |
|                                     | <i>Placebo vs. Only SGAs</i>              | -11.02% * | 0.032 | 0.001  | -0.173 | -0.048 |
|                                     | <i>Placebo vs. FGA + placebo</i>          | 1.49%     | 0.042 | 0.723  | -0.068 | 0.098  |
|                                     | <i>FGA + placebo vs. Only SGAs</i>        | -12.51% * | 0.035 | 0.001  | -0.195 | -0.055 |

\* The mean difference is significant at the 0.05 level. Multiple comparisons only performed for variables with  $p < 0.05$  on ANOVA.

**Table S3. PRISMA Checklist.**

| Section and Topic    | Checklist Item                                                                                                                                                                                                                                                                      | Where Item Is Reported         |
|----------------------|-------------------------------------------------------------------------------------------------------------------------------------------------------------------------------------------------------------------------------------------------------------------------------------|--------------------------------|
| <b>TITLE</b>         |                                                                                                                                                                                                                                                                                     |                                |
| Title                | 1. Identify the report as a systematic review.                                                                                                                                                                                                                                      | Page 1                         |
| <b>ABSTRACT</b>      |                                                                                                                                                                                                                                                                                     |                                |
| Abstract             | 2. See the PRISMA 2020 for Abstracts checklist.                                                                                                                                                                                                                                     | Page 1                         |
| <b>INTRODUCTION</b>  |                                                                                                                                                                                                                                                                                     |                                |
| Rationale            | 3. Describe the rationale for the review in the context of existing knowledge.                                                                                                                                                                                                      | Pages 1–3, evidence in context |
| Objectives           | 4. Provide an explicit statement of the objective(s) or question(s) the review addresses.                                                                                                                                                                                           | Lines 107–110                  |
| <b>METHODS</b>       |                                                                                                                                                                                                                                                                                     |                                |
| Eligibility criteria | 5. Specify the inclusion and exclusion criteria for the review and how studies were grouped for the syntheses.                                                                                                                                                                      | Item 2.2                       |
| Information sources  | 6. Specify all databases, registers, websites, organisations, reference lists and other sources searched or consulted to identify studies. Specify the date when each source was last searched or consulted.                                                                        | Item 2.1                       |
| Search strategy      | 7. Present the full search strategies for all databases, registers and websites, including any filters and limits used.                                                                                                                                                             | Item 2.1                       |
| Selection process    | 8. Specify the methods used to decide whether a study met the inclusion criteria of the review, including how many reviewers screened each record and each report retrieved, whether they worked independently, and if applicable, details of automation tools used in the process. | Item 2.3                       |

|                               |                                                                                                                                                                                                                                                                                                                                                                                                                                                                                                           |                                 |
|-------------------------------|-----------------------------------------------------------------------------------------------------------------------------------------------------------------------------------------------------------------------------------------------------------------------------------------------------------------------------------------------------------------------------------------------------------------------------------------------------------------------------------------------------------|---------------------------------|
| Data collection process       | 9. Specify the methods used to collect data from reports, including how many reviewers collected data from each report, whether they worked independently, any processes for obtaining or confirming data from study investigators, and if applicable, details of automation tools used in the process.                                                                                                                                                                                                   | Item 2.3                        |
| Data items                    | 10a. List and define all outcomes for which data were sought. Specify whether all results that were compatible with each outcome domain in each study were sought (e.g., for all measures, time points, analyses), and if not, the methods used to decide which results to collect.<br>10b. List and define all other variables for which data were sought (e.g., participant and intervention characteristics, funding sources). Describe any assumptions made about any missing or unclear information. | Item 2.3                        |
| Study risk of bias assessment | 11. Specify the methods used to assess risk of bias in the included studies, including details of the tool(s) used, how many reviewers assessed each study and whether they worked independently, and if applicable, details of automation tools used in the process.                                                                                                                                                                                                                                     | Item 2.3                        |
| Effect measures               | 12. Specify for each outcome the effect measure(s) (e.g., risk ratio, mean difference) used in the synthesis or presentation of results.                                                                                                                                                                                                                                                                                                                                                                  | NA                              |
| Synthesis methods             | 13a. Describe the processes used to decide which studies were eligible for each synthesis (e.g., tabulating the study intervention characteristics and comparing against the planned groups for each synthesis (item #5)).                                                                                                                                                                                                                                                                                | Item 2.2                        |
|                               | 13b. Describe any methods required to prepare the data for presentation or synthesis, such as handling of missing summary statistics, or data conversions.                                                                                                                                                                                                                                                                                                                                                | Item 2.4                        |
|                               | 13c. Describe any methods used to tabulate or visually display results of individual studies and syntheses.                                                                                                                                                                                                                                                                                                                                                                                               | NA                              |
|                               | 13d. Describe any methods used to synthesize results and provide a rationale for the choice(s). If meta-analysis was performed, describe the model(s), method(s) to identify the presence and extent of statistical heterogeneity, and software package(s) used.                                                                                                                                                                                                                                          | Item 2.4                        |
|                               | 13e. Describe any methods used to explore possible causes of heterogeneity among study results (e.g., subgroup analysis, meta-regression).                                                                                                                                                                                                                                                                                                                                                                | Item 2.4                        |
| Reporting bias assessment     | 14. Describe any methods used to assess risk of bias due to missing results in a synthesis (arising from reporting biases).                                                                                                                                                                                                                                                                                                                                                                               | NA                              |
| Certainty assessment          | 15. Describe any methods used to assess certainty (or confidence) in the body of evidence for an outcome.                                                                                                                                                                                                                                                                                                                                                                                                 | NA                              |
| <b>RESULTS</b>                |                                                                                                                                                                                                                                                                                                                                                                                                                                                                                                           |                                 |
| Study selection               | 16a. Describe the results of the search and selection process, from the number of records identified in the search to the number of studies included in the review, ideally using a flow diagram.<br>16b. Cite studies that might appear to meet the inclusion criteria, but which were excluded, and explain why they were excluded.                                                                                                                                                                     | Figure 1<br>NA                  |
| Study characteristics         | 17. Cite each included study and present its characteristics.                                                                                                                                                                                                                                                                                                                                                                                                                                             | Appendix A                      |
| Risk of bias in studies       | 18. Present assessments of risk of bias for each included study.                                                                                                                                                                                                                                                                                                                                                                                                                                          | NA                              |
| Results of individual studies | 19. For all outcomes, present, for each study: (a) summary statistics for each group (where appropriate) and (b) an effect estimate and its precision (e.g., confidence/credible interval), ideally using structured tables or plots.<br>20a. For each synthesis, briefly summarise the characteristics and risk of bias among contributing studies.                                                                                                                                                      | Appendix A, Table A1<br>Table 2 |
| Results of syntheses          | 20b. Present results of all statistical syntheses conducted. If meta-analysis was done, present for each the summary estimate and its precision (e.g., confidence/credible interval) and measures of statistical heterogeneity. If comparing groups, describe the direction of the effect.                                                                                                                                                                                                                | Tables 2–4                      |



|                                 |                                                                                                                                                                                                                                                |                |
|---------------------------------|------------------------------------------------------------------------------------------------------------------------------------------------------------------------------------------------------------------------------------------------|----------------|
|                                 | 20c. Present results of all investigations of possible causes of heterogeneity among study results.                                                                                                                                            | NA             |
|                                 | 20d. Present results of all sensitivity analyses conducted to assess the robustness of the synthesized results.                                                                                                                                | NA             |
| Reporting biases                | 21. Present assessments of risk of bias due to missing results (arising from reporting biases) for each synthesis assessed.                                                                                                                    | NA             |
| Certainty of evidence           | 22. Present assessments of certainty (or confidence) in the body of evidence for each outcome assessed.                                                                                                                                        | NA             |
| <b>DISCUSSION</b>               |                                                                                                                                                                                                                                                |                |
|                                 | 23a. Provide a general interpretation of the results in the context of other evidence.                                                                                                                                                         | Lines 254–292  |
|                                 | 23b. Discuss any limitations of the evidence included in the review.                                                                                                                                                                           | Lines 332–346  |
| Discussion                      | 23c. Discuss any limitations of the review processes used.                                                                                                                                                                                     | Lines 332–346  |
|                                 | 23d. Discuss implications of the results for practice, policy, and future research.                                                                                                                                                            | Lines 347–367  |
| <b>OTHER INFORMATION</b>        |                                                                                                                                                                                                                                                |                |
|                                 | 24a. Provide registration information for the review, including register name and registration number, or state that the review was not registered.                                                                                            | Not registered |
| Registration and protocol       | 24b. Indicate where the review protocol can be accessed, or state that a protocol was not prepared.                                                                                                                                            | Item 2.1       |
|                                 | 24c. Describe and explain any amendments to information provided at registration or in the protocol.                                                                                                                                           | NA             |
| Support                         | 25. Describe sources of financial or non-financial support for the review, and the role of the funders or sponsors in the review.                                                                                                              | Line 373–374   |
| Competing interests             | 26. Declare any competing interests of review authors.                                                                                                                                                                                         | Line 375       |
| Availability of other materials | 27. Report which of the following are publicly available and where they can be found: template data collection forms; data extracted from included studies; data used for all analyses; analytic code; any other materials used in the review. | NA             |

*From:* Page MJ, McKenzie JE, Bossuyt PM, Boutron I, Hoffmann TC, Mulrow CD, et al. The PRISMA 2020 statement: an updated guideline for reporting systematic reviews. *BMJ* 2021;372:n71. doi: 10.1136/bmj.n71.
